# Supplementary material
Source: PubMed Central journal article supplement (PMC9829667)

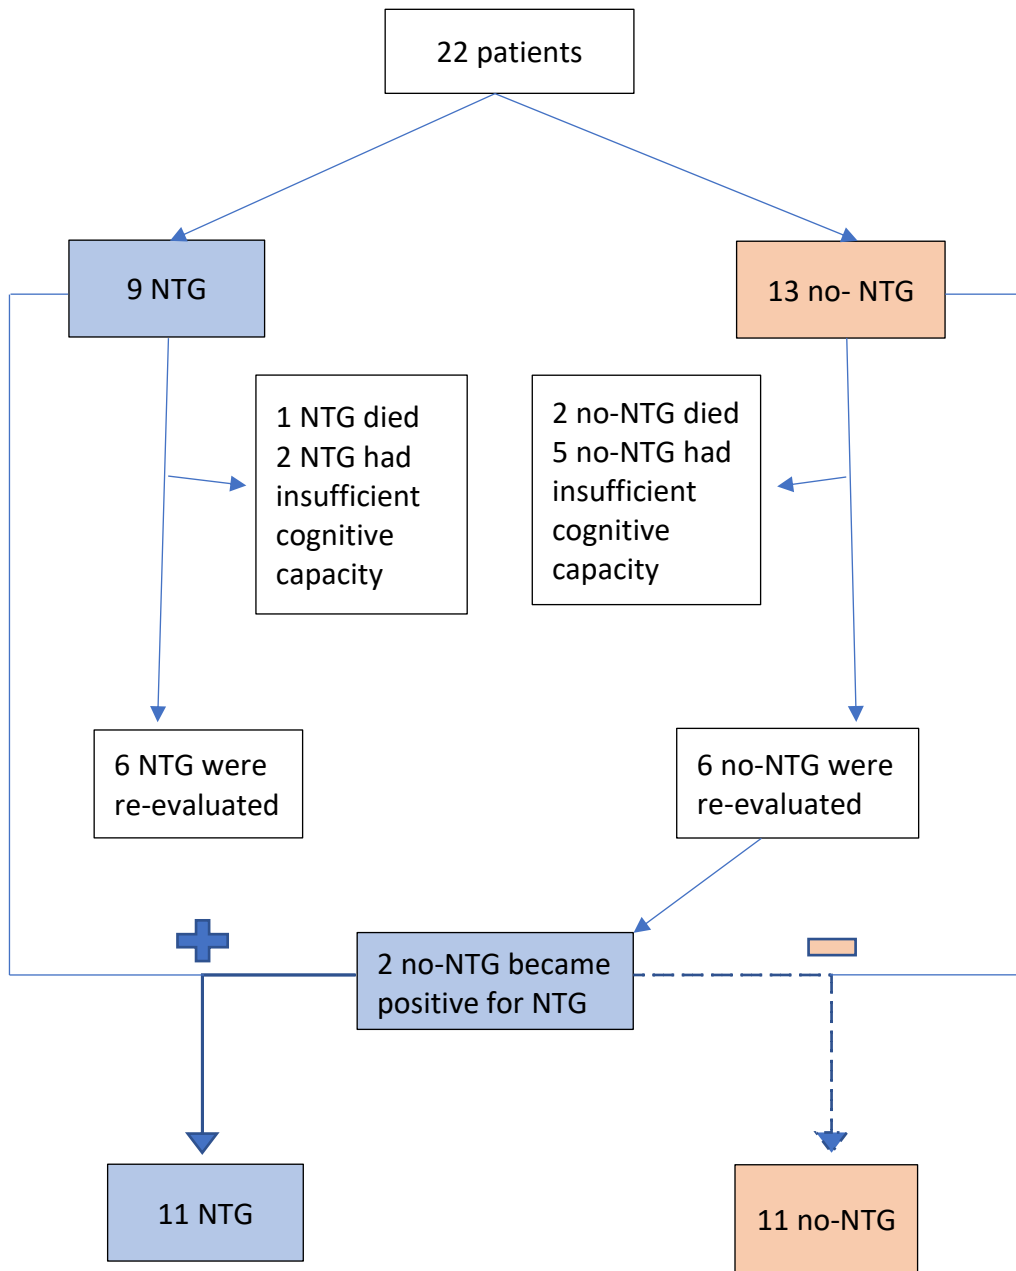

Supplement: 41433_2022_2064_MOESM1_ESM.pdf [file 41433_2022_2064_MOESM1_ESM.pdf]
